# Supplementary material for: Egg albumen templated graphene foams for high-performance supercapacitor electrodes and electrochemical sensors
Source: Royal Society of Chemistry journal article supplement (doi:10.1039/c8ta04561e), 2018-01-01
Supplement: c8ta04561e1.pdf [file c8ta04561e1.pdf]

## Supporting Information

# Egg Albumen Templated Graphene Foams for High-Performance Supercapacitor Electrodes and Electrochemical Sensors

*Ya Liu,<sup>a,b</sup> Xiaoli Zhao,<sup>a</sup> Cancan Wang,<sup>a</sup> Long Zhang,<sup>a</sup> MengXiong Li,<sup>a</sup> Yunmei Pan,<sup>a</sup>*

*Hongbin Lu,<sup>a,\*</sup> and Johan Liu<sup>b,c,\*</sup>*

<sup>a</sup>State Key Laboratory of Molecular Engineering of Polymers, Department of Macromolecular Science, Collaborative Innovation Center of Polymers and Polymer Composites, Fudan University, 2005 Songhu Road, Shanghai 200433, China,

<sup>b</sup>Electronics Materials and Systems Laboratory (EMSL), Department of Microtechnology and Nanoscience (MC2), Chalmers University of Technology, Kemivägen 9, SE-412 96 Göteborg, Sweden and <sup>c</sup>SMIT Center, Shanghai University, No 20, Chengzhong Road, Shanghai, 201800, China.

*\*Corresponding author. <sup>a</sup>E- mail: [hongbinlu@fudan.edu.cn](mailto:hongbinlu@fudan.edu.cn)*

*<sup>b,c</sup>E- mail: [johan.liu@chalmers.se](mailto:johan.liu@chalmers.se)*

---

## Table of Contents:

- [1] The Preparation procedures of Reduced Graphene Oxide (RGO).
- [2] **Fig. S1.** Thermogravimetric analyses of egg albumen.
- [3] **Fig. S2.** Raman spectra of (a) GO and GF; (b) GF-400, GF-600 and GF-800.
- [4] **Fig. S3.** SEM images of egg albumen foams with low (a) and high (b) magnifications.
- [5] **Fig. S4.** XPS survey scan spectrum of obtained GF.
- [6] **Fig. S5.** The Band structures of (a) pristine graphene, (b) N, S, Si doped flawless graphene, (c) N, S, Si doped defective graphene.
- [7] **Fig. S6.** XRD patterns of (a) GO and GF; (b) GF, Ni-GF and Ni-foam.
- [8] **Fig. S7.** Galvanostatic charging and discharging curves of RGO.
- [9] **Fig. S8.** (a) Galvanostatic charging and discharging curves of GF-800/PTFE. (b) Nyquist plots of GF-800/PTFE and GF-800; the inset shows the comparison at the high frequency region.
- [10] **Fig. S9.** Bode plots of phase angle versus frequency.
- [11] **Fig. S10.** CV curves of GF electrode in PBS solutions with different pH values (4, 5, 6, 7, 8) with the presence of dopamine. Scan rate = 100 mV s<sup>-1</sup>.
- [12] **Fig. S11.** CV curves of GF electrode in PBS solutions with different ratio of egg albumen and GO slurry (1:1, 1:2, 1:3) with the presence of dopamine. Scan rate = 100 mV s<sup>-1</sup>.
- [13] **Table S1.** Comparison of time constant for the samples in this study and the reported carbon-based materials

---

[14] **Table S2.** Elemental analysis (CNS) results of GF-800.

[15] **Table S3.** Comparison of supercapacitor performances for the samples in this study and the carbon-based materials from literature.

[16] **Table S4.** The specific electrochemical biosensors for detecting dopamine.

**The Preparation procedures of Reduced Graphene Oxide (RGO):** Firstly GO slurry suffer from suddenly frozen with liquid nitrogen and followed by freeze-drying for 2 days to form GO aerogel. Then the GO aerogel is transferred into tube furnace at 800 °C for 2 h. Before heating, the tube was purged with N<sub>2</sub> for 30 minutes, and the heating rate is set at 10 °C min<sup>-1</sup>.

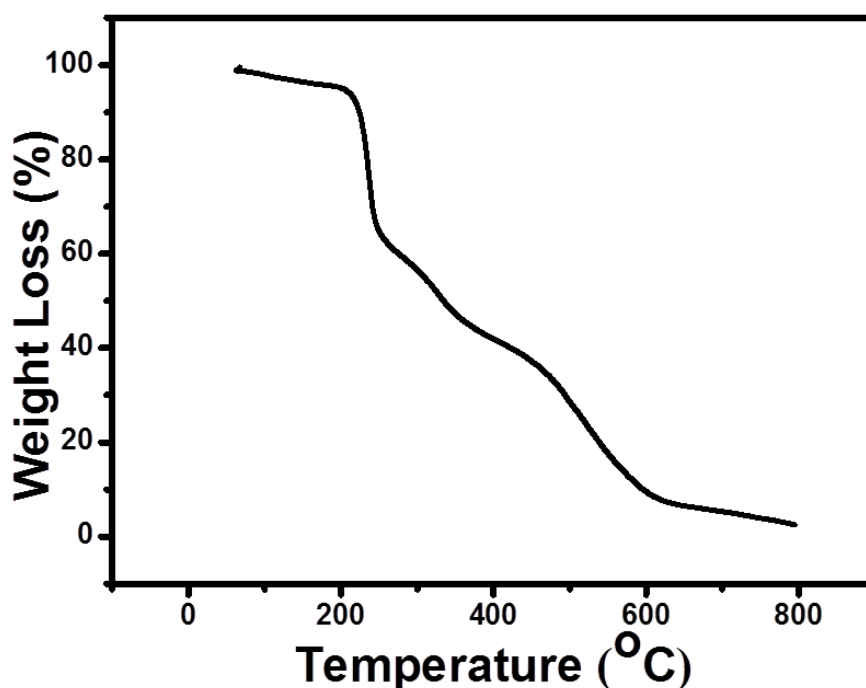

**Fig. S1.** Thermogravimetric analyses of egg albumen.

To further identify the components of GF, thermogravimetric analyses are performed to examine the thermal stability of egg albumen. Apparently, egg albumen is completely removed by pyrolysis with approximately 100% weight loss of TGA test.

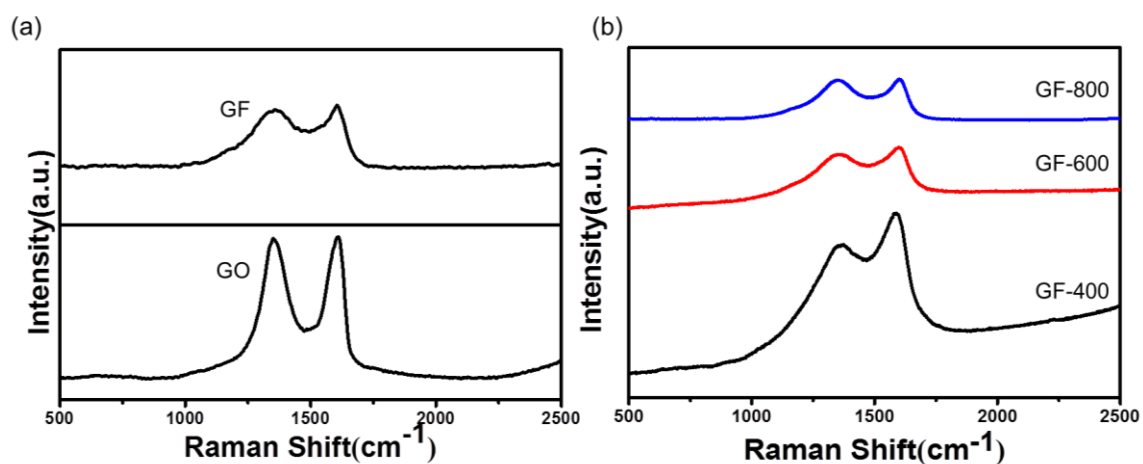

**Fig. S2.** Raman spectra of (a) GO and GF; (b) GF-400, GF-600 and GF-800.

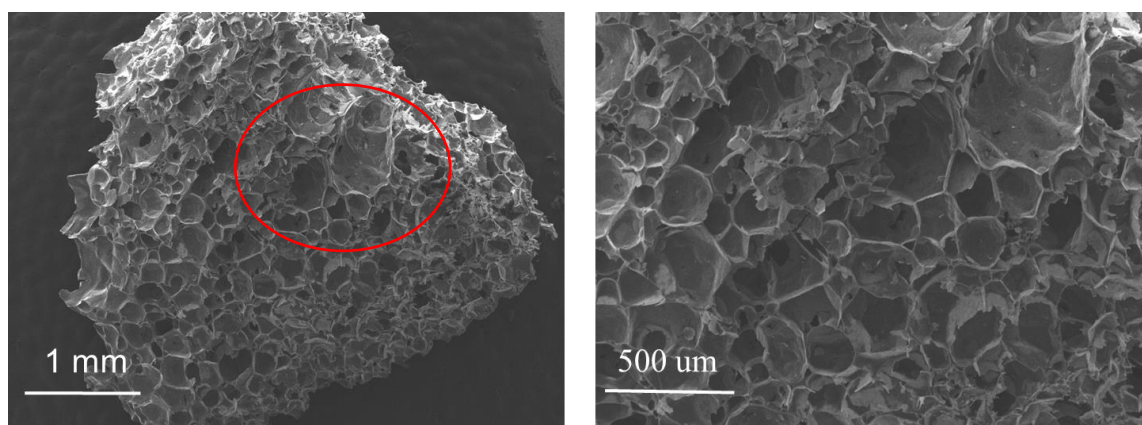

**Fig. S3.** SEM images of egg albumen foam with low (a) and high (b) magnifications.

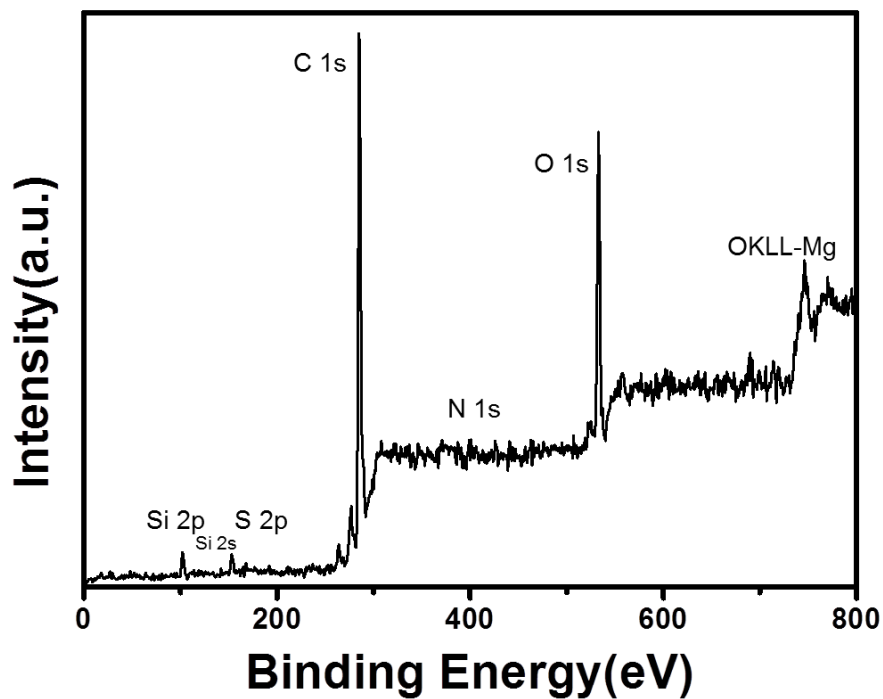

**Fig. S4.** XPS survey scan spectrum of obtained GF.

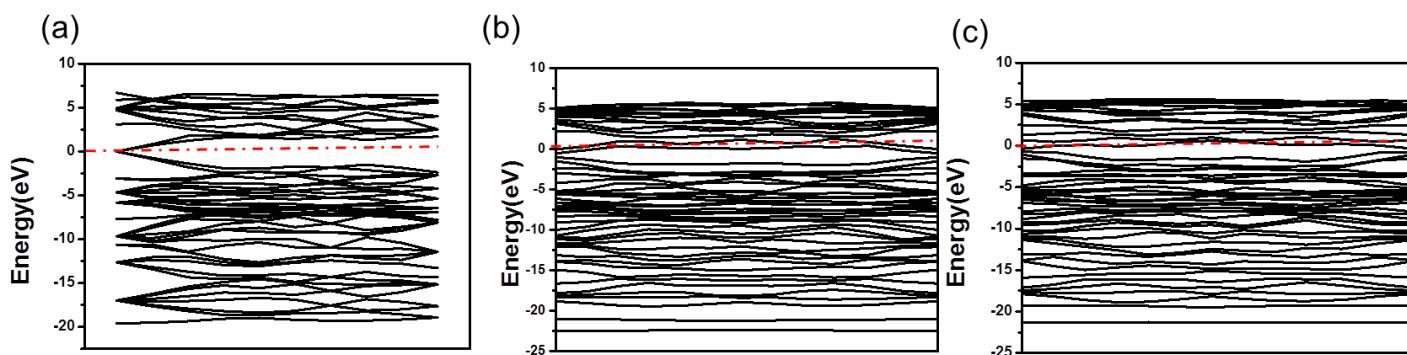

**Fig. S5.** The Band structures of (a) pristine graphene, (b) N, S, Si doped flawless graphene, (c) N, S, Si doped defective graphene.

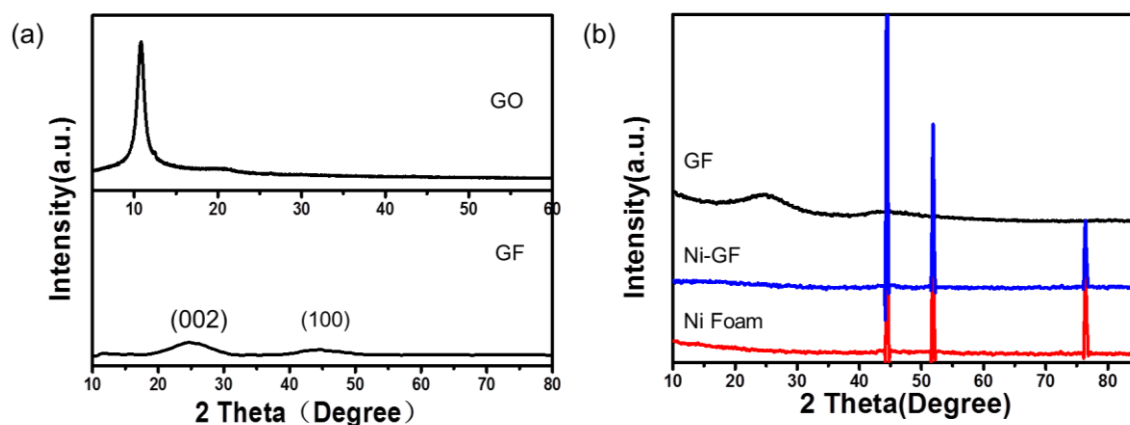

**Fig. S6.** XRD patterns of (a) GO and GF; (b) GF, Ni-GF and Ni-foam.

XRD diffraction for GO, GF, Ni-foams (before and after annealing at 800°C) were carried out to verify where the capacitance comes from. The sharp diffraction peak at 10°, indicating pristine GO, disappears after thermal reduction at tube furnace suggesting that oxygen-containing groups have been removed in GF. Proverbially, two dominated broad and weak peaks of GF at position of  $2\theta = 24^\circ$  and  $43^\circ$  are attributed to (002) and (100) reflections of graphitic carbon layers, respectively. It is reported that porous structure and chemical doping are able to broaden peak width of (002).<sup>1</sup> After calcination, the peaks of Ni-foams match well with the peaks of original Ni-foams. This result confirms that Ni-foams keep stability during heating process. Thus we can exclude the contribution of  $\text{Ni}(\text{OH})_2$  to the capacitance.

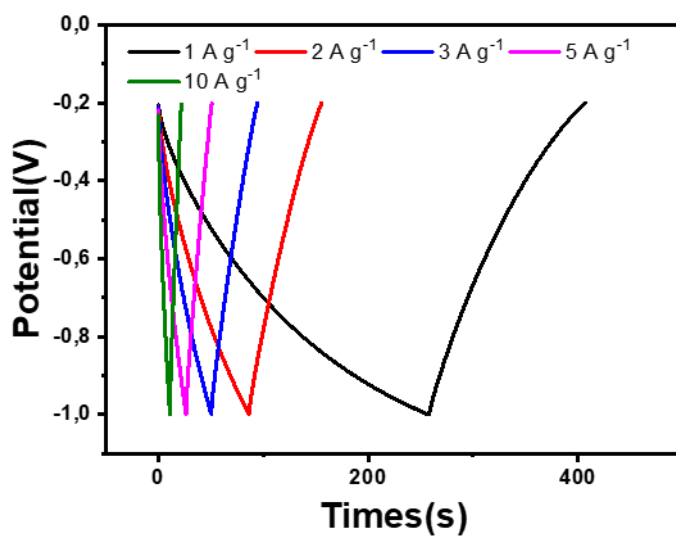

**Fig. S7.** Galvanostatic charging and discharging curves of RGO.

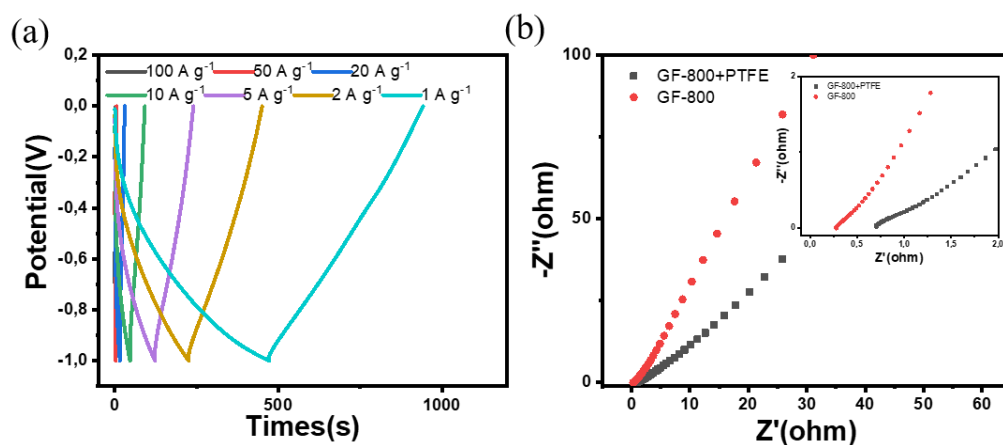

**Fig. S8.** (a) Galvanostatic charging and discharging curves of GF-800/PTFE. (b) Nyquist plots of GF-800/PTFE and GF-800; the inset shows the comparison at the high frequency region.

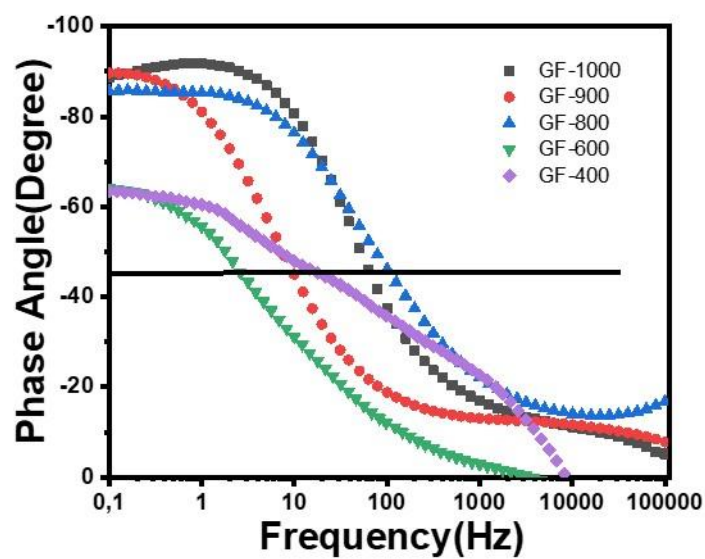

**Fig. S9.** Bode plots of phase angle versus frequency.

**Table S1.** Comparison of time constants for the samples in this study and the carbon-based materials from literature

| Electrode materials                          | Time constant | Reference |
|----------------------------------------------|---------------|-----------|
| GF-800                                       | 0.009         | This Work |
| Multilayered Graphene Films                  | 0.0133        | 2         |
| Hierarchical Nitrogen-Doped Carbon Nanocages | 0.39          | 3         |



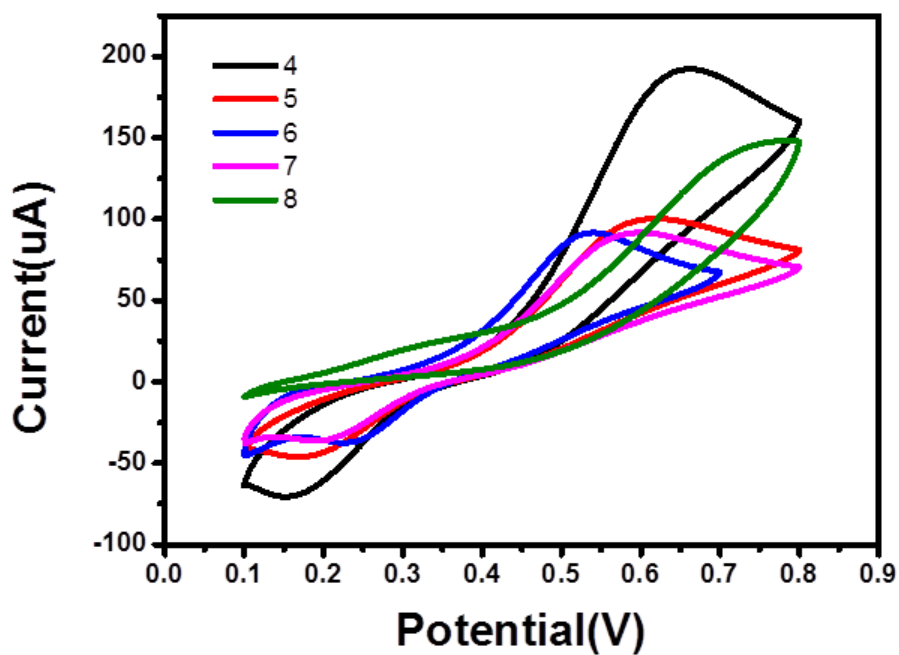

**Fig. S10.** CV curves of GF electrode in 0.1 M PBS solution with different pH values (4, 5, 6, 7, 8) with the presence of dopamine. Scan rate =  $100 \text{ mV s}^{-1}$ .

The pH dependence of DA with PBS solution is observed. Well-defined oxidation peaks can be observed when pH value ranging from 4 to 8, while redox peak disappear with the pH value increasing to 8 due to the deprotonation of hydroxyl groups of DA in alkali media, which consistent with reported results.

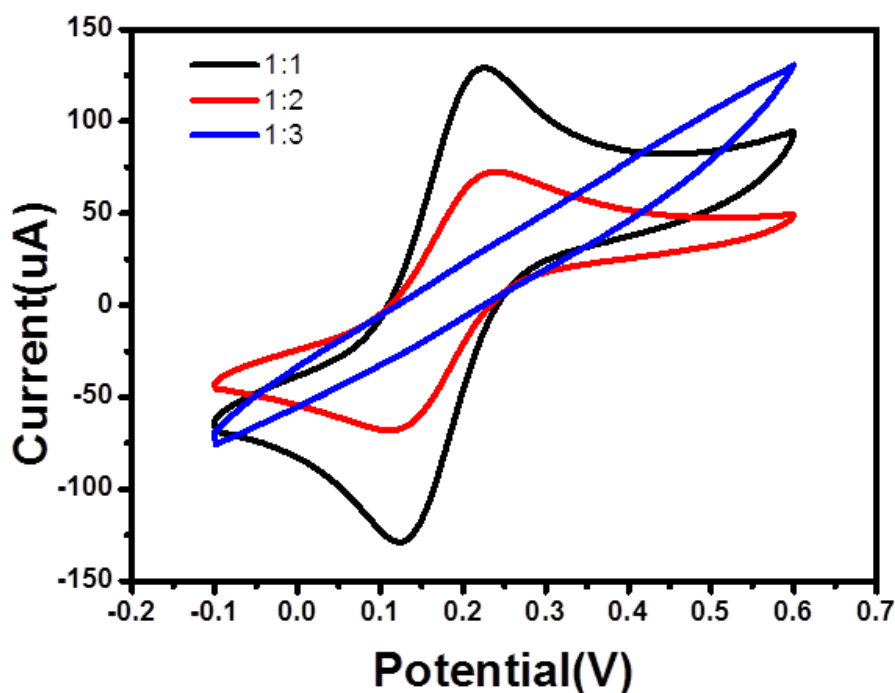

**Fig. S11.** CV curves of GF electrode in 0.1 M PBS solutions with different weight ratio of egg albumen and GO slurry (1:1, 1:2, 1:3) with the presence of dopamine. Scan rate = 100 mV s<sup>-1</sup>.

Electrochemical sensing performance of different weight percentage of GF are studied and the 50% turn out to be the optimal weight ratio for GO slurry.

**Table S2.** Elemental analysis (CNS) results of GF-800.

| Sample   | N(%) | C(%)  | S(%) |
|----------|------|-------|------|
| GF 800-1 | 4.9  | 78.59 | 0.31 |
| GF 800-2 | 4.83 | 78.43 | 0.33 |

**Table S3.** Comparison of supercapacitor performances for the samples in this study

and the carbon-based materials from literature.

| Electrode materials                               | BET SSA(m <sup>2</sup> g <sup>-1</sup> ) | Cs(F g <sup>-1</sup> )/Current density(A g <sup>-1</sup> ) | Rate capacity                    | Cycling stability                      | Reference  |
|---------------------------------------------------|------------------------------------------|------------------------------------------------------------|----------------------------------|----------------------------------------|------------|
| GF                                                |                                          | 534/1                                                      | 58%<br>(100A g <sup>-1</sup> )   |                                        | This Study |
| N,S Co-Doped Graphene Hydrogel                    | -                                        | 536/5(mV s <sup>-1</sup> )                                 | 72%<br>(100 mV s <sup>-1</sup> ) | 94.75%<br>(7500, 4A g <sup>-1</sup> )  | 4          |
| Hierarchical N-doped carbon nanocages             | 1794                                     | 313/1                                                      | 75%<br>(100A g <sup>-1</sup> )   | 98%<br>(20000, 10A g <sup>-1</sup> )   | 3          |
| Hierarchical Carbon                               | 2582                                     | 401/5                                                      | 87%<br>(100 A g <sup>-1</sup> )  | 93%<br>(4000,10A g <sup>-1</sup> )     | 5          |
| Holey graphene frameworks                         | 830                                      | 310/1                                                      | 76%<br>(100A g <sup>-1</sup> )   | 95%<br>(20000,25A g <sup>-1</sup> )    | 6          |
| Nitrogen and sulfur co-doped graphene nanoribbons | -                                        | 442/0.5                                                    | 63%<br>(10A g <sup>-1</sup> )    | 98.6%<br>(10000, 2A g <sup>-1</sup> )  | 7          |
| 3D interconnected graphene nanocapsules           | 1985                                     | 277 /0.05                                                  | 70%<br>(25A g <sup>-1</sup> )    | 93%<br>(15000, 2A g <sup>-1</sup> )    | 8          |
| Sulfur and phosphorus co-doping of graphene       | 409                                      | 438 /10(mV s <sup>-1</sup> )                               | 87%<br>(500 mV s <sup>-1</sup> ) | 93.4%<br>(10000, 1A g <sup>-1</sup> )  | 9          |
| graphene aerogels                                 | 312                                      | 442/0.5                                                    | 63%<br>(10A g <sup>-1</sup> )    | 97.9%<br>(10000, 2A g <sup>-1</sup> )  | 10         |
| Nitrogen-Superdoped Graphene                      | 583                                      | 380/0.6                                                    | 63.2%<br>(10A g <sup>-1</sup> )  | 93.5%<br>(4600,5 A g <sup>-1</sup> )   | 11         |
| 3D Few-Layer Graphene-like Carbon                 | 1545                                     | 231/1                                                      | 56%<br>(2000 A g <sup>-1</sup> ) | 99%<br>(20000,1005A g <sup>-1</sup> )  | 12         |
| ultrathin porous carbon shell                     | 526                                      | 251/1                                                      | 91%<br>(20A g <sup>-1</sup> )    | 97%<br>(10000, 3 A g <sup>-1</sup> )   | 13         |
| Mesoporous nitrogen-rich carbons                  | 800                                      | 390.4/0.25                                                 | 68%<br>(30A g <sup>-1</sup> )    | 93%<br>(10000, 2 A g <sup>-1</sup> )   | 14         |
| nonporous carbon nanofibers                       | -                                        | 243.7/0.5                                                  | 83%<br>(30A g <sup>-1</sup> )    | >100%<br>(8000, 30 A g <sup>-1</sup> ) | 15         |
| 3D printing graphene                              | 436                                      | 57.5/0.5                                                   | 65%<br>(10A g <sup>-1</sup> )    | -                                      | 16         |

Note: SSA: specific surface area, Cs: specific capacitance, -: not available.

**Table S4.** The specific electrochemical biosensors for detecting dopamine.

| Sensors        | Method | Detection limit/uM | Linear range/uM | Reference  |
|----------------|--------|--------------------|-----------------|------------|
| GF             | DPV    | 1.2                | 0.125-70        | This Study |
| graphene ink   | DPV    | 2.21               | 3–140           | 17         |
| Au NPs/rGO/GCE | DPV    | 1.4                | 6.8–41          | 18         |

|                                         |     |        |                 |    |
|-----------------------------------------|-----|--------|-----------------|----|
| Hemin/GO/GCE                            | DPV | 0.17   | 0.5–40          | 19 |
| PEDOT modified LSG                      | DPV | 0.33   | 1-150           | 20 |
| N-2/Ar/GS/GNR                           | i-t | 0.0025 | 0.01-400        | 21 |
| Au-Cu <sub>2</sub> O/rGO                | DPV | 0.0039 | 10-90           | 22 |
| Co <sub>3</sub> O <sub>4</sub> /rGO/GCE | i-t | 0.277  | 1-30            | 23 |
| HNP-PtTi                                | DPV | -      | 0.000004-0.0005 | 24 |
| pristine graphene                       | i-t | 2      | 5-710           | 25 |
| 3D N-doped graphene                     | DPV | 0.001  | 3-100           | 26 |

## REFERENCES

- Z. Xiong, C. Liao, W. Han and X. Wang, *Advanced Materials*, 2015, **27**, 4469-4475.
- X. W. Yang, J. W. Zhu, L. Qiu and D. Li, *Advanced Materials*, 2011, **23**, 2833-+.
- J. Zhao, H. W. Lai, Z. Y. Lyu, Y. F. Jiang, K. Xie, X. Z. Wang, Q. Wu, L. J. Yang, Z. Jin, Y. W. Ma, J. Liu and Z. Hu, *Advanced Materials*, 2015, **27**, 3541-3545.
- N. Q. Tran, B. K. Kang, M. H. Woo and D. H. Yoon, *ChemSusChem*, 2016, **9**, 2261-2268.
- J. Xu, Z. Tan, W. Zeng, G. Chen, S. Wu, Y. Zhao, K. Ni, Z. Tao, M. Ikram and H. Ji, *Advanced Materials*, 2016, **28**, 5222.
- Y. Xu, Z. Lin, X. Zhong, X. Huang, N. O. Weiss, Y. Huang and X. Duan, *Nature Communications*, 2014, **5**, 4554.
- K. Gopalsamy, J. Balamurugan, T. D. Thanh, N. H. Kim and J. H. Lee, 2017.
- X. He, X. Li, H. Ma, J. Han, H. Zhang, C. Yu, N. Xiao and J. Qiu, *Journal of Power Sources*, 2017, **340**.
- X. Yu, Y. Kang and H. S. Park, *Carbon*, 2016, **101**, 49-56.
- S. M. Jung, D. L. Mafra, C. T. Lin, H. Y. Jung and J. Kong, *Nanoscale*, 2015, **7**, 4386-4393.
- W. Zhang, C. Xu, C. Ma, G. Li, Y. Wang, K. Zhang, F. Li, C. Liu, H. M. Cheng and Y. Du, *Advanced Materials*, 2017, **29**.
- J. Zhao, Y. Jiang, H. Fan, M. Liu, O. Zhuo, X. Wang, Q. Wu, L. Yang, Y. Ma and Z. Hu, *Advanced Materials*, 2017, **29**, 1604569.
- W. Yang, F. Ding, G. Shao, L. Sang, W. Yang and Z. Ma, *Carbon*, 2017, **111**, 419-427.
- Z. Li, Z. Xu, X. Tan, H. Wang, C. M. B. Holt, T. Stephenson, B. C. Olsen and D. Mitlin, *Energy & Environmental Science*, 2013, **6**, 871-878.
- Y. Yang, X. Hou, C. Ding, J. Lan, Y. Yu and X. Yang, *Inorganic Chemistry Frontiers*, 2017.
- C. Zhu, T. Liu, F. Qian, T. Y. Han, E. B. Duoss, J. D. Kuntz, C. M. Spadaccini, M. A. Worsley and Y. Li, *Nano Letters*, 2016, **16**, 3448.
- L. Fu, A. W. Wang, G. S. Lai, W. T. Su, F. Malherbe, J. H. Yu, C. T. Lin and A. M. Yu, *Talanta*, 2018, **180**, 248-253.
- C. Wang, P. Xu and K. Zhuo, *Electroanalysis*, 2014, **26**, 191-198.
- H. L. Zou, B. L. Li, H. Q. Luo and N. B. Li, *Sensors & Actuators B Chemical*, 2015, **207**, 535-541.
- G. Xu, Z. A. Jarjes, V. Desprez, P. A. Kilmartin and J. Travas-Sejdic, *Biosensors & bioelectronics*, 2018, **107**, 184-191.

- 
21. L. Jothi, S. Neogi, S. K. Jaganathan and G. Nageswaran, *Biosensors & Bioelectronics*, 2018, **105**, 236-242.
  22. T. K. Aparna, R. Sivasubramanian and M. A. Dar, *J. Alloy. Compd.*, 2018, **741**, 1130-1141.
  23. A. Numan, M. M. Shahid, F. S. Omar, K. Ramesh and S. Ramesh, *Sens. Actuator B-Chem.*, 2017, **238**, 1043-1051.
  24. D. Y. Zhao, G. L. Yu, K. L. Tian and C. X. Xu, *Biosensors & Bioelectronics*, 2016, **82**, 119-126.
  25. S. P. Qi, B. Zhao, H. Q. Tang and X. Q. Jiang, *Electrochimica Acta*, 2015, **161**, 395-402.
  26. X. M. Feng, Y. Zhang, J. H. Zhou, Y. Li, S. F. Chen, L. Zhang, Y. W. Ma, L. H. Wang and X. H. Yan, *Nanoscale*, 2015, **7**, 2427-2432.
